# Supplementary material for: Molecular engineering towards safer lithium-ion batteries: a highly stable and compatible redox shuttle for overcharge protection
Source: Royal Society of Chemistry journal article supplement (doi:10.1039/c2ee21977h), 2012-01-01
Supplement: c2ee21977h.pdf [file c2ee21977h.pdf]

## Supporting Information

# Molecular Engineering towards Safer Lithium-Ion Batteries: A Highly Stable and Compatible Redox Shuttle for Overcharge Protection

Lu Zhang, Zhengcheng Zhang,<sup>\*,†</sup> Paul C. Redfern,<sup>‡</sup> Larry A. Curtiss,<sup>‡</sup> and Khalil

Amine<sup>\*,1</sup>

<sup>†</sup>Chemical Sciences and Engineering Division, <sup>‡</sup>Material Sciences Division,

Argonne National Laboratory

9700 South Cass Avenue, Argonne, IL 60439, USA

E-mail: [zzhang@anl.gov](mailto:zzhang@anl.gov); [amine@anl.gov](mailto:amine@anl.gov)

## Experiments:

### 1. Synthesis

1,4-di-*tert*-butyl-2,5-bis(2-methoxyethoxy)methoxybenzene (DBMOEB) and 1,4-bis(2-methoxyethoxy)-2,5-di-*tert*-butylbenzene (DBBB) are not commercially available and were synthesized in our lab according to the following procedure (**Figure S1**). 2,5-di-*tert*-butylhydroquinone (9 mmol) was dissolved in anhydrous THF (20 ml). Sodium hydride (27 mmol) and 2-methoxyethoxymethyl chloride or 2-chloroethyl methyl ether (18 mmol) was added to the solution. The reaction was stirred at room temperature for overnight.

---

After removal of the solvent, the residue was partitioned between dichloromethane (DCM) and  $\text{NaHCO}_3$  (0.1 M). The organic portion was separated and dried over  $\text{Na}_2\text{SO}_4$  before solvent was removed under vacuum. The crude product was chromatographed (silica, hexanes/DCM from 5:1 to 1:1) to afford oligo(ethylene glycol) functionalized compounds, which were further purified by crystallization from saturated dichloromethane solution under low temperature. For DBMOEB, the yield was 65% and it has been fully characterized by the following methods:  $^1\text{H}$  NMR (300 MHz,  $\text{CDCl}_3$ ):  $\delta$ /ppm 7.14 (s, 2H), 5.25 (s, 4H), 3.86 (t,  $J = 4.5$  Hz, 4H), 3.60 (t,  $J = 4.5$  Hz, 4H), 3.40 (s, 6H), 1.36 (s, 18 H);  $^{13}\text{C}$  NMR (125 MHz,  $\text{CDCl}_3$ ):  $\delta$ /ppm 151.01, 137.00, 114.53, 94.37, 71.93, 67.53, 59.26, 34.80; Mass spectroscopy ( $\text{EI}^+$ ): calcd.  $(\text{M}+\text{Na})^+$  421.2561, found  $(\text{M}+\text{Na})^+$  421.2562.

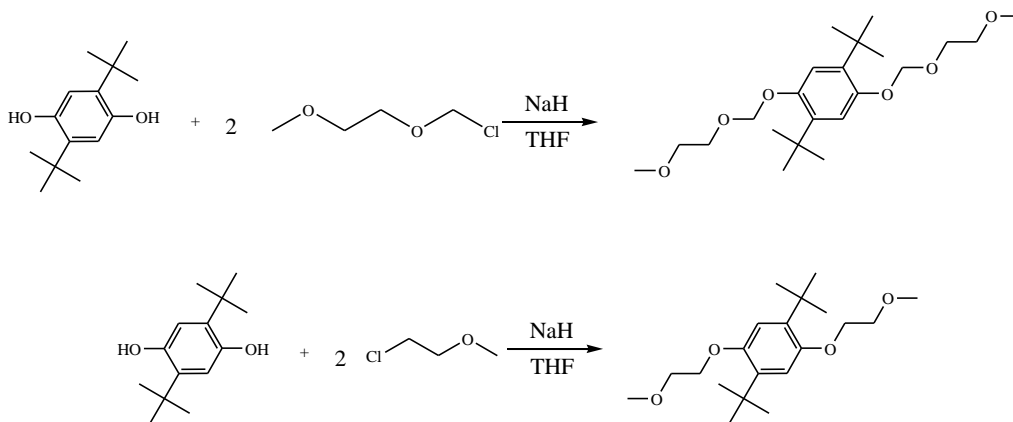

**Figure S1.** Synthesis routes of 1,4-di-*tert*-butyl-2,5-bis(2-methoxyethoxy)methoxybenzene (DBMOEB) and 1,4-bis(2-methoxyethoxy)-2,5-di-*tert*-butylbenzene (DBBB).

---

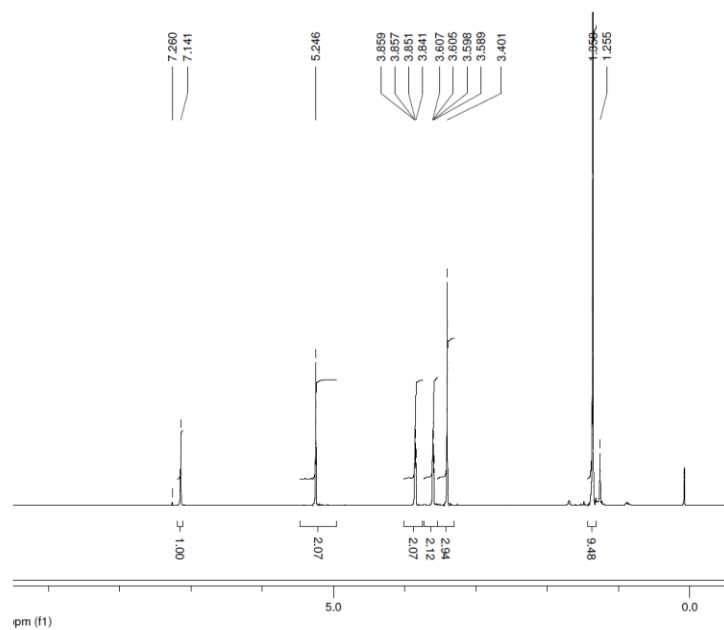

**Figure S2.** <sup>1</sup>H-NMR spectrum of the DBMOEB.

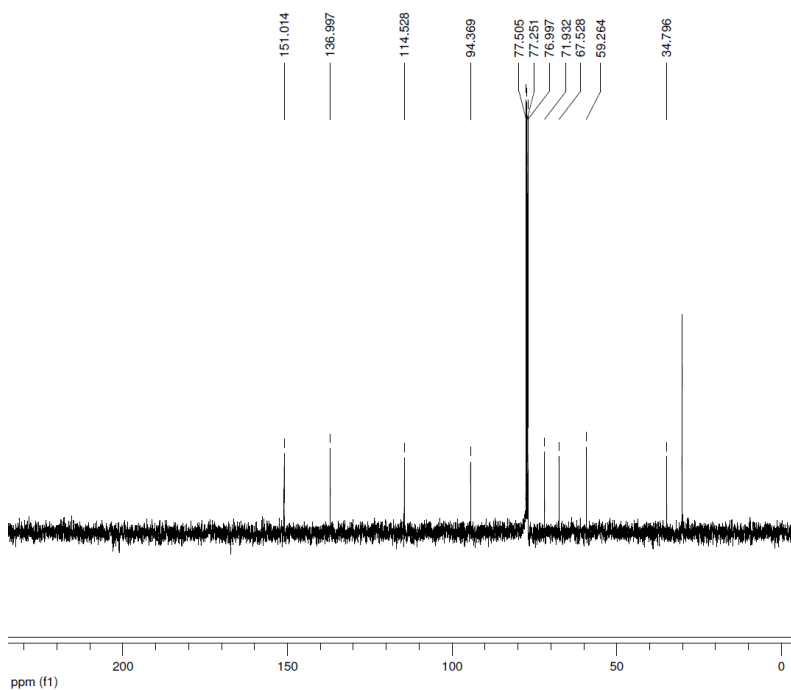

**Figure S3.** <sup>13</sup>C-NMR spectrum of the DBMOEB.

|               |                    |             |                      |                 |              |                        |                      |
|---------------|--------------------|-------------|----------------------|-----------------|--------------|------------------------|----------------------|
| Sample Name   | DBDEMEB            | Position    | P1-C9                | Instrument Name | Instrument 1 | User Name              |                      |
| Inj Vol       | 0.5                | InjPosition |                      | SampleType      | Sample       | IRM Calibration Status | Success              |
| Data Filename | DBDEMEB_03112012.d | ACQ Method  | ESI_ASI_Pos_03122009 | Comment         |              | Acquired Time          | 3/11/2010 3:05:31 PM |

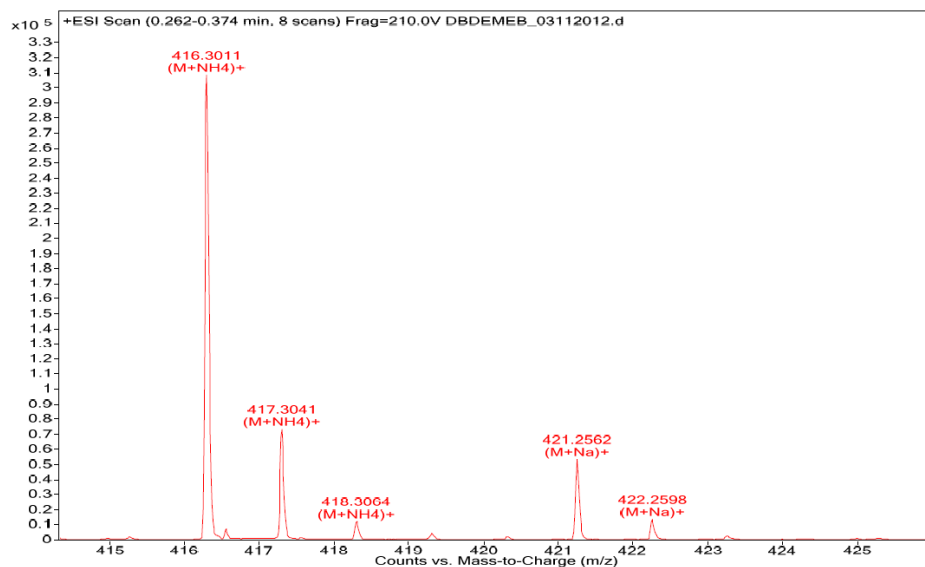

**Figure S4.** Mass spectrum of the DBMOEB.

For DBBB, the yield was 70% and it has been fully characterized by the following methods: <sup>1</sup>H NMR (300 MHz, CDCl<sub>3</sub>): δ/ppm 6.86 (s, 2H), 4.14 (t, J = 1.5 Hz, 4H), 3.79 (t, J = 1.5 Hz, 4H), 3.47 (s, 6H), 1.39 (s, 18 H); <sup>13</sup>C NMR (125 MHz, CDCl<sub>3</sub>): δ/ppm 151.53, 136.76, 112.82, 71.89, 68.28, 59.41, 34.95; Melting point: 69.3-70.1°C; Mass spectroscopy (EI<sup>+</sup>): calcd. (M+Na)<sup>+</sup> 361.2364, found (M+Na)<sup>+</sup> 361.2365.

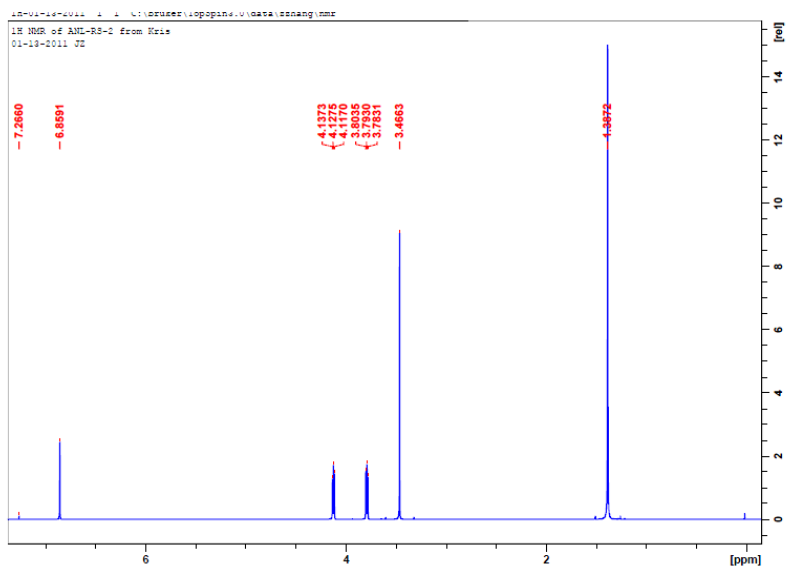

**Figure S5.**  $^1\text{H}$ -NMR spectrum of the DBBB.

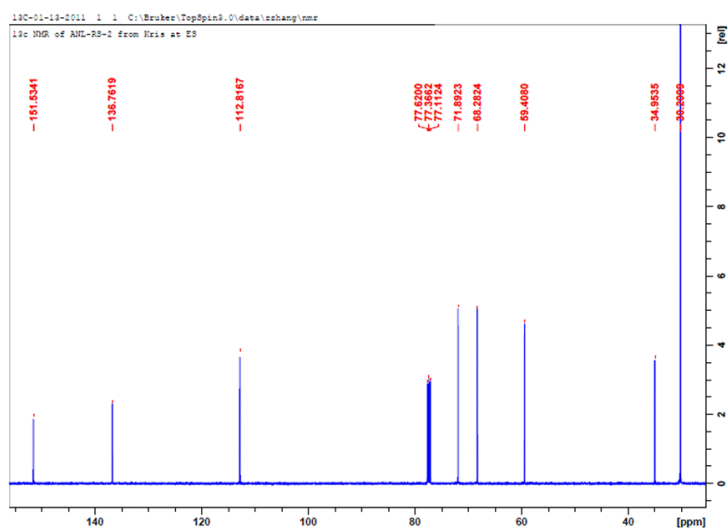

**Figure S6.**  $^{13}\text{C}$ -NMR spectrum of the DBBB.

|               |                      |             |             |                 |                                   |                        |             |
|---------------|----------------------|-------------|-------------|-----------------|-----------------------------------|------------------------|-------------|
| Sample Name   | Unavailable          | Position    | Unavailable | Instrument Name | Unavailable                       | User Name              | Unavailable |
| Inj Vol       | Unavailable          | InjPosition | Unavailable | SampleType      | Unavailable                       | IRM Calibration Status | Success     |
| Data Filename | ANL-RS2_05172011_ESI | ACQ Method  |             | Comment         | Sample information is unavailable | Acquired Time          | Unavailable |

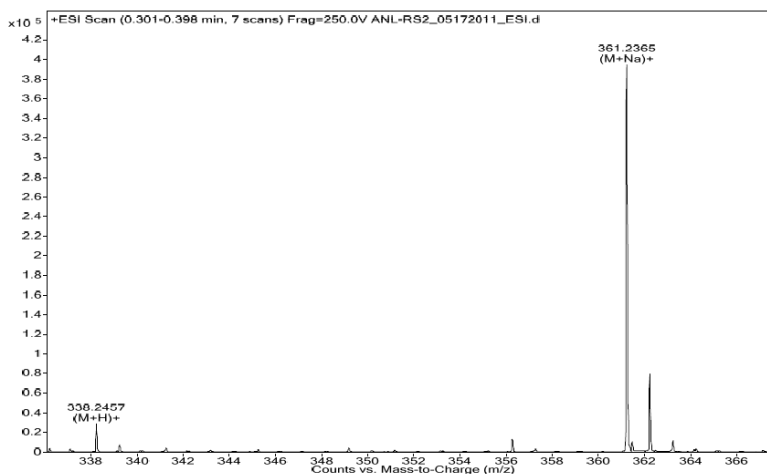

**Figure S7.** Mass spectrum of the DBBB.

## 2. Electrochemical measurements

Cyclic voltammetry (CV) experiments were performed in custom-made three electrode cells with 1 mm diameter Pt working electrode, a Li metal reference electrode, and a Li counter electrode using Solartron Analytical 1470E system. The overcharge test was conducted by assembling LiFePO<sub>4</sub>/graphite 2032 coin cells. Graphite electrode used is mesocarbon microbeads (MCMB). The lamination of LiFePO<sub>4</sub> electrode is composed of 80% LiFePO<sub>4</sub> active material, 12% acetylene carbon black and 8% PVDF as binder. The electrolyte used was 1.2 M LiPF<sub>6</sub> in EC/EMC in a weight ratio of 3:7 (Gen 2 electrolyte). The concentrations of the shuttle molecule varied from 0.1 M to 0.4 M. The cells were charged using a constant current to 200% capacity (100% overcharge ratio) or until a specific upper cutoff voltage was reached (normally 4.95V vs Li/Li<sup>+</sup>), whichever occurred first. After the charging process, the cells were discharged to a normal cutoff voltage using the same constant current.

### 3. Computational Methods

B3LYP calculations were performed with Gaussian 03<sup>1</sup>. Free energies were calculated as follows. B3LYP/6-31G\* optimization and frequency calculations were performed followed by PCM SCRF calculations at the B3LYP/6-31+G\* level with modified water solvent. A dielectric constant of 55.725 was used to represent a typical 25% EC/25% ethyl methyl carbonate/50% PC electrolyte. B3LYP/6-311+g(3df,2p) energies were then calculated to account for the effects of a larger basis set.

### 4. Diffusion coefficient

Diffusion coefficient is an important parameter to evaluate the efficiency of the charge shunting process of redox shuttles. **Figure S9** plots the anodic peak current ( $I_p$ ) versus the square root of the sweep rates ( $v^{1/2}$ ). The resulting slope was then substituted into the Randles-Sevcik<sup>2</sup> equation (1) to calculate the diffusion coefficient, where  $I_p$  is the anodic peak current,  $n$  is the number of electrons involved in the redox process,  $C$  is the concentration of redox shuttle and  $D$  is the diffusion coefficient. The linear slope derived from **Figure S9** suggests diffusion-controlled redox chemistry. The calculated diffusion coefficient for DBBB is  $9.26 \times 10^{-7}$  cm/s.

$$i_p = (269,000)n^{3/2}AD^{1/2}Cv^{1/2} \quad (1)$$

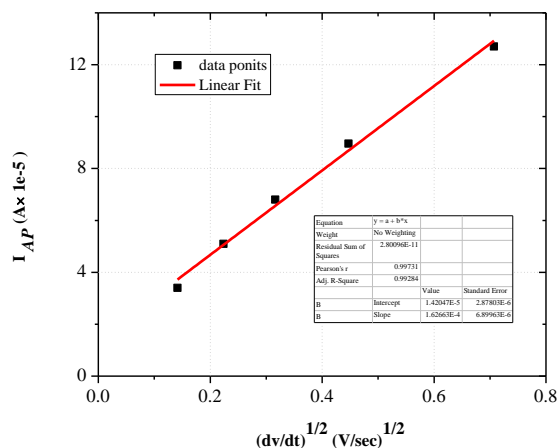

**Figure S9.** Plot of  $I_p$  vs.  $v^{1/2}$  used for determination of diffusion constant.

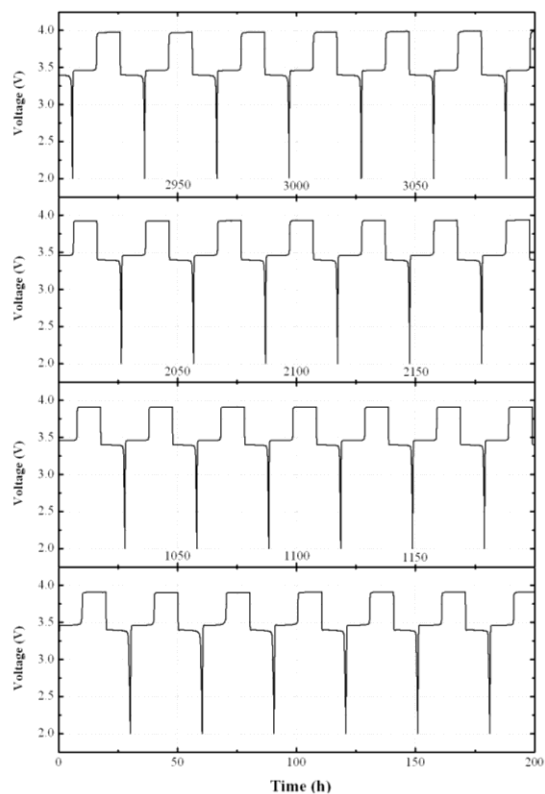

**Figure S10.** Voltage profiles of overcharge abuse tests using Li/LiFePO<sub>4</sub> coin cells containing 0.1 M DBBB in Gen 2 electrolyte during the course of 0-3000 h. Charging rate is C/10 and overcharge ratio is 100%.



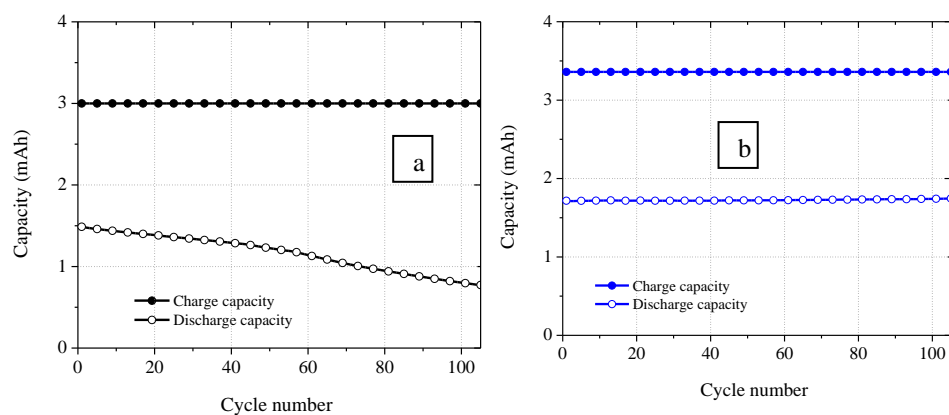

**Figure S11.** Capacity profiles of overcharge abuse tests using MCMB/ LiFePO<sub>4</sub> (a) and Li/LiFePO<sub>4</sub> (b) coin cells containing 0.1 M DBBB in Gen 2 electrolyte. Charging rate is C/10 and overcharge ratio is 100%. The difference of charge and discharge capacity comes from the electricity shunted by redox shuttle additive during overcharge.

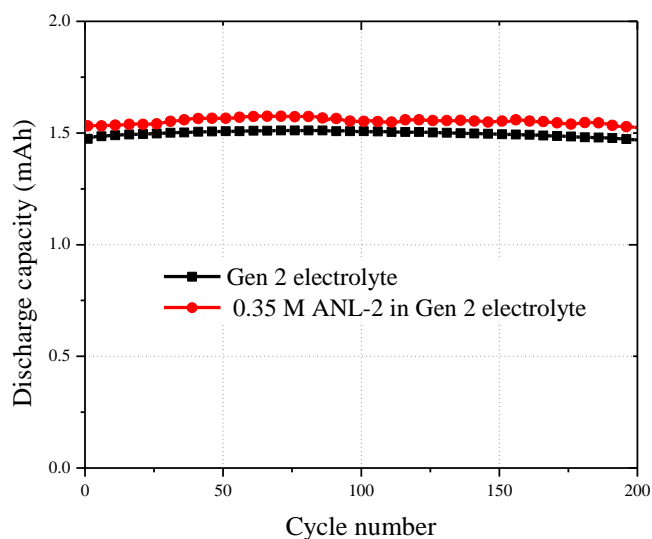

**Figure S12.** Capacity retention profiles of normal cycle tests using MCMB/LiFePO<sub>4</sub> coin cells containing none or 0.35 M DBBB in Gen 2 electrolyte. Charging rate is C/3 and cut off voltage is 2.3 ~3.6 V.

## Reference:

- (1) M. J. Frisch, G. W. T., H. B. Schlegel, G. E. Scuseria, M. A. Robb, J. R. Cheeseman, J. A. Montgomery, Jr., T. Vreven, K. N. Kudin, J. C. Burant, J. M. Millam, S. S. Iyengar, J. Tomasi, V. Barone, B. Mennucci, M. Cossi, G. Scalmani, N. Rega, G. A. Petersson, H. Nakatsuji, M. Hada, M. Ehara, K. Toyota, R. Fukuda, J. Hasegawa, M. Ishida, T. Nakajima, Y. Honda, O. Kitao, H. Nakai, M. Klene, X. Li, J. E. Knox, H. P. Hratchian, J. B. Cross, V. Bakken, C. Adamo, J. Jaramillo, R. Gomperts, R. E. Stratmann, O. Yazyev, A. J. Austin, R. Cammi, C. Pomelli, J. W. Ochterski, P. Y. Ayala, K. Morokuma, G. A. Voth, P. Salvador, J. J. Dannenberg, V. G. Zakrzewski, S. Dapprich, A. D. Daniels, M. C. Strain, O. Farkas, D. K. Malick, A. D. Rabuck, K. Raghavachari, J. B. Foresman, J. V. Ortiz, Q. Cui, A. G. Baboul, S. Clifford, J. Cioslowski, B. B. Stefanov, G. Liu, A. Liashenko, P. Piskorz, I. Komaromi, R. L. Martin, D. J. Fox, T. Keith, M. A. Al-Laham, C. Y. Peng, A. Nanayakkara, M. Challacombe, P. M. W. Gill, B. Johnson, W. Chen, M. W. Wong, C. Gonzalez, and J. A. Pople, Gaussian, Inc., Wallingford CT, 2004. 2003.
- (2) Feng, J. K.; Ai, X. P.; Cao, Y. L.; Yang, H. X. *Electrochemistry Communications* **2007**, *9*, 25.
